# Supplementary material for: LIR motifs and the membrane-targeting domain are complementary in the function of RavZ
Source: PubMed Central journal article supplement — BMB Rep. 2019 Dec 31;52(12):700–5. doi: 10.5483/BMBRep.2019.52.12.211 (PMC6941762; doi:10.5483/bmbrep.2019.52.12.211), 2019-12-31
Supplement: bmb-52-700_Supple.pdf [file bmb-52-700_Supple.pdf]

## LIR motifs and the membrane-targeting domain are complementary in the function of RavZ

Sang-Won Park<sup>1,3</sup>, Yong-Woo Jun<sup>1,3</sup>, Pureum Jeon<sup>2</sup>, You-Kyung Lee<sup>2</sup>, Ju-Hui Park<sup>1</sup>, Seung-Hwan Lee<sup>1</sup>, Jin-A Lee<sup>2,\*</sup>, and Deok-Jin Jang<sup>1,\*</sup>

<sup>1</sup>Department of Ecological Science, College of Ecology and Environment, Kyungpook National University, Sangju, Korea; <sup>2</sup>Department of Biological Sciences and Biotechnology, College of Life Sciences and Nanotechnology, Hannam University, Daejeon, Korea.

<sup>3</sup>These authors contributed equally to the work.

### Supplemental table 1. Primer sequences used for the experiments.

| Construct                                         | Primer sequences (5'-3')                                                                              |
|---------------------------------------------------|-------------------------------------------------------------------------------------------------------|
| RavZ (WT) and RavZ (C258S)                        | Forward: AAGAGATCTATGAAAGGCAAGTTAACA<br>Reverse: GTAGGGCCCCTATTTTACCTTAATGCC                          |
| RavZ (mLIR1)                                      | Forward: GAGGCTGAAGAAGCGGGAGAACAGGAATCCGAT<br>Reverse: TCCCGCTTCTTCAGCCTCATCCACTATTAATTT              |
| RavZ (mLIR2)                                      | Forward: GAAGCTGATCTTGCTGAAGGTGATGAGAAATTG<br>Reverse: TTCAGCAAGATCAGCTTCATCGATATCGGATTC              |
| RavZ (mLIR3)                                      | Forward: GATGCTGTGACTGCCGAAAAAGACGAACTATTC<br>Reverse: TTCGGCAGTCACAGCATCATCTATCGTATCATC              |
| RavZ ( $\Delta$ MT) and RavZ (C258S, $\Delta$ MT) | Forward: TGAGAAGCTTCCTGGCGACTCAGAGCTT<br>Reverse: CACGCGTCGACCGTTAATGTTTTACCTTCAGTCAA                 |
| RavZ LIR 1-2                                      | Forward: CGCCCAAGCTTGCCACCATGATAGTGGATGAGTTTGAA<br>Reverse: GACGGTACCCTCATCACCTTCAAGAAG               |
| RavZ LIR 3                                        | Forward: CGACCGCTCGAGACGATAGATGATGCTGTG<br>Reverse: ATAAGAATGCGGCCGCCTATTTTACCTTAATGCCACC             |
| Catalytic domain                                  | Forward: AAGAGATCTTCTATTTATCCTCCCGAA<br>Reverse: CACGCGTCGACCTATAATGTTTTACCTTCAGT                     |
| Membrane targeting domain                         | Forward: CTAGGGCTAGCGCCACCATGCCGGTACAGCTTTCTGAA<br>Reverse: GACGGTACCATCATCAAACCTTGACACA              |
| Catalytic domain ( $\Delta\alpha$ 3)              | Forward: CTGCAACGTTTATACTTCCTATTACCAAAGGGTTCAACA<br>Reverse: TGTTGAACCCCTTTGGTAATAGGAAGTATAAACGTTGCAG |
